# Supplementary material for: Electronic Structure and d-Band Center Control Engineering over Ni-Doped CoP3 Nanowall Arrays for Boosting Hydrogen Production
Source: MDPI journal article supplement (doi:10.3390/nano11061595), 2021-06-17
Supplement: s1 [file s1]

# Supplementary Materials

Article

## Electronic Structure and *d*-Band Center Control Engineering over Ni-doped CoP<sub>3</sub> Nanowall Arrays for Boosting Hydrogen Production

Jing Qi, Tianli Wu \*, Mengyao Xu, Dan Zhou and Zhubing Xiao\*

Henan Key Laboratory of Photovoltaic Materials, Henan University, Kaifeng, 475004, China; jingqi\_henu@163.com (J.Q.); mengyaoxu\_henu@163.com (M.X.); hxzhoud@163.com (D.Z.)

\* Correspondence: tianliwu@henu.edu.cn (T.W.); zbxiao@vip.henu.edu.cn (Z.X.)

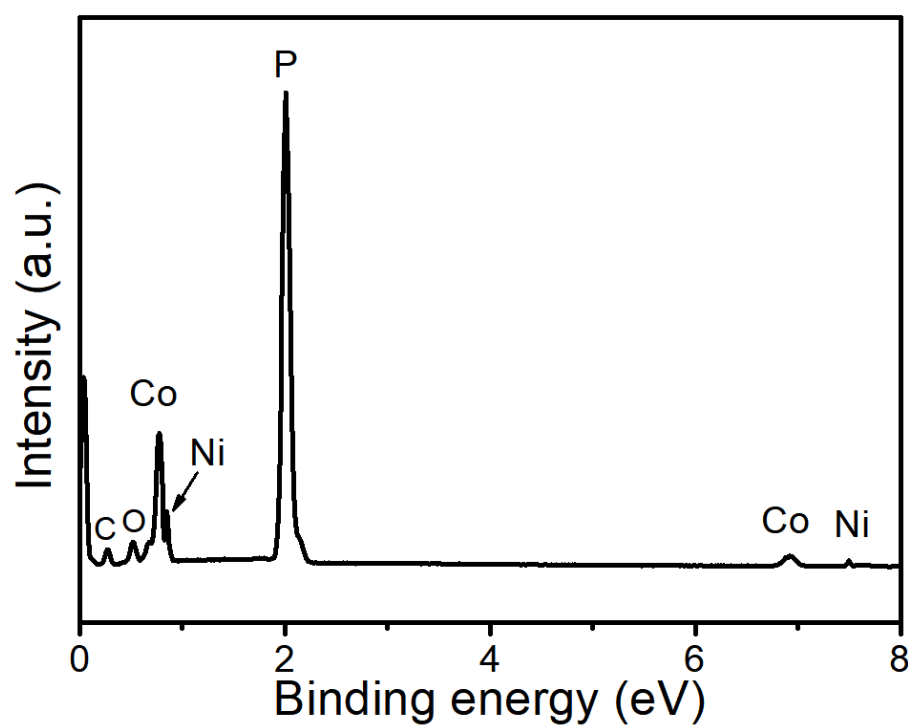

Figure S1. EDX spectrum of Ni-CoP<sub>3</sub>-7 NWAs/CC.

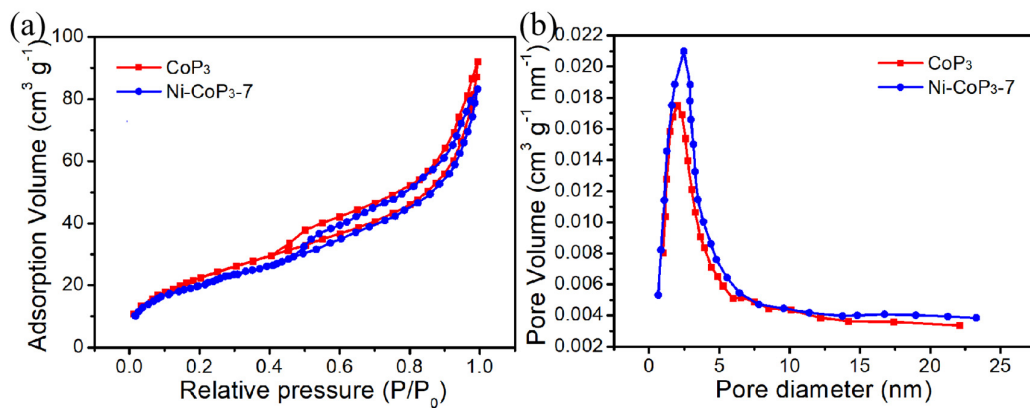

**Figure S2.** (a) Nitrogen adsorption/desorption isotherm and (b) the BJH pore-size distribution curve of CoP<sub>3</sub> and Ni-CoP<sub>3</sub>-7 NWAs, respectively.

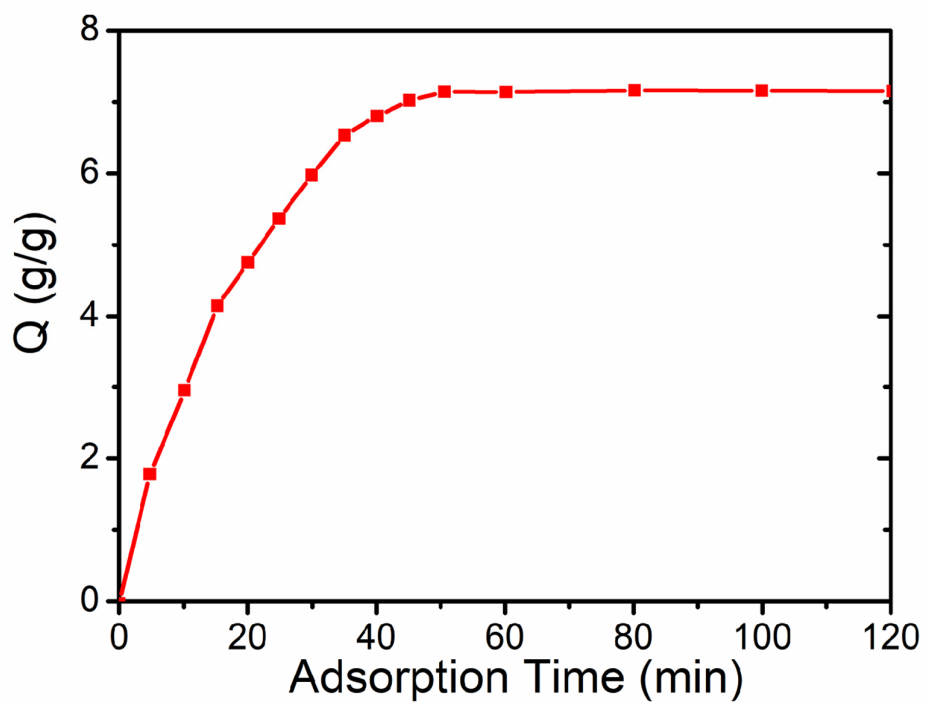

**Figure S3.** The dependence of the adsorption time on the amount of absorbed H<sup>+</sup> (based on the quality of HCl) on the Ni-CoP<sub>3</sub>-7 NWAs catalysts in 5 mM aqueous solution.

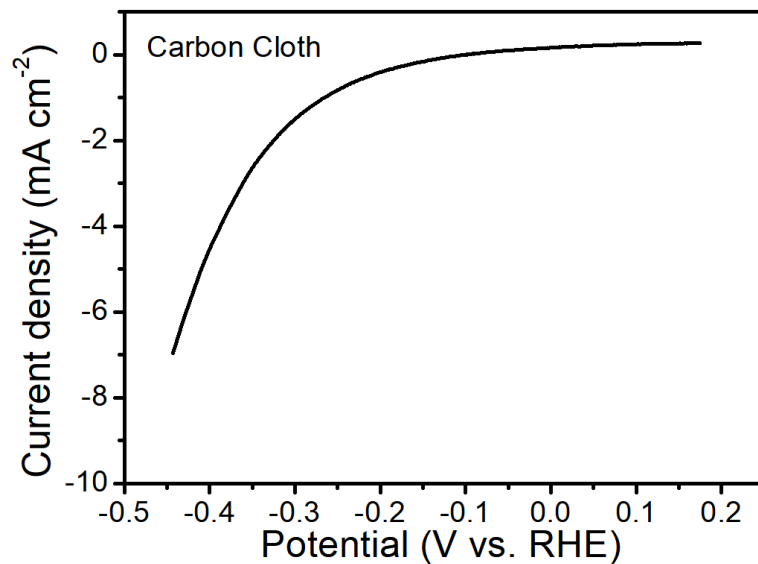

**Figure S4.** Polarization curves of CC in 0.5 M H<sub>2</sub>SO<sub>4</sub>.

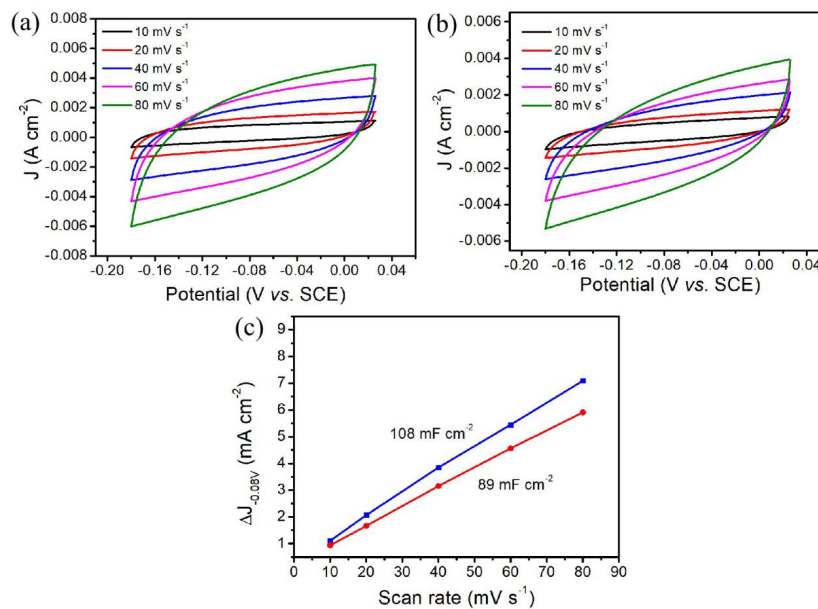

**Figure S5.** Cyclic voltammograms in the region of -0.18-0.02 V vs. SCE at various scan rates and the corresponding linear fitting of the capacitive currents vs. scan rates to estimate the double layer capacitance: (a) Ni-CoP<sub>3</sub>-7 NWAs/CC and (b) CoP<sub>3</sub> NWAs/CC; (c) The capacitive currents were measured at -0.08 V vs. SCE plotted as a function of scan rate.

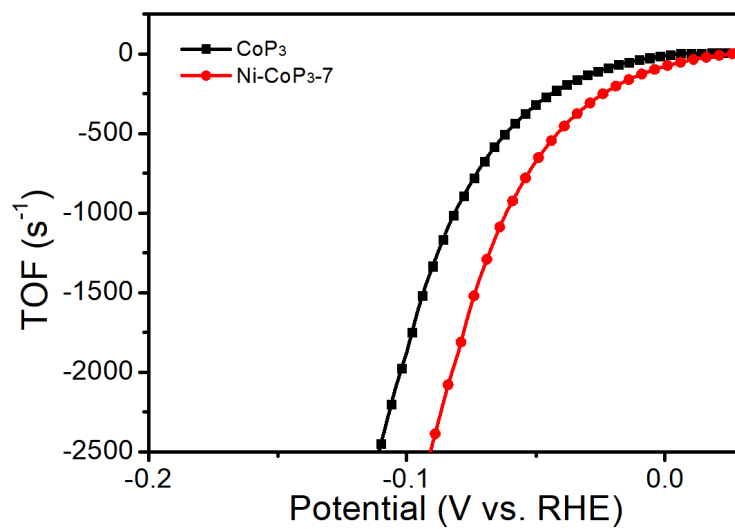

**Figure S6.** TOF curves of CoP<sub>3</sub> and Ni-CoP<sub>3</sub>-7.

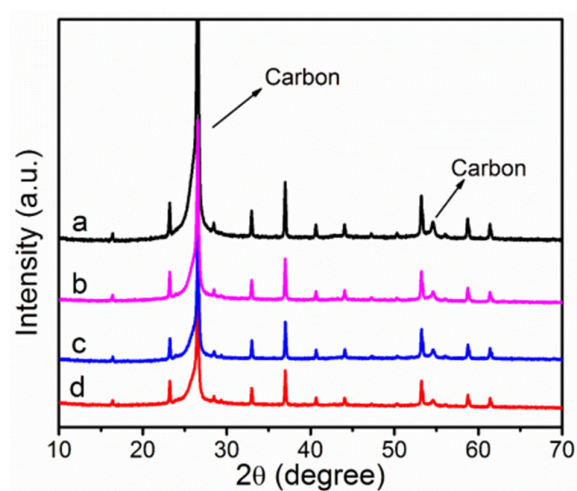

**Figure S7.** (a) XRD patterns of Ni-CoP<sub>3</sub>-7 NWAs/CC and (b–d) the XRD patterns of Ni-CoP<sub>3</sub>-7 NWAs/CC electrode after 5000 cycles CV scanning at pH 0, pH 7 and pH 14, respectively.

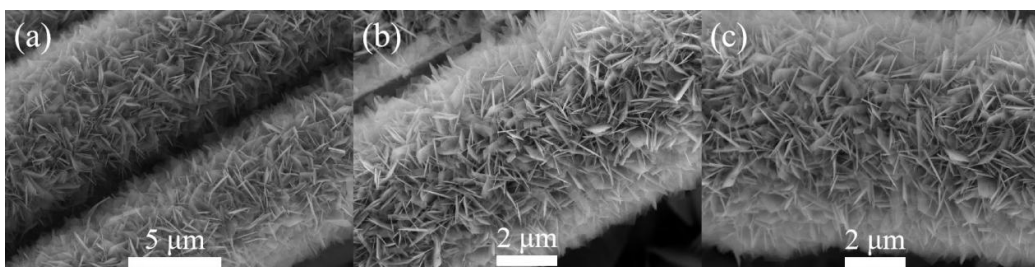

**Figure S8.** SEM images after 5000 cycles CV scanning at pH 0 (a), pH 7 (b) and pH 14 (c), respectively.

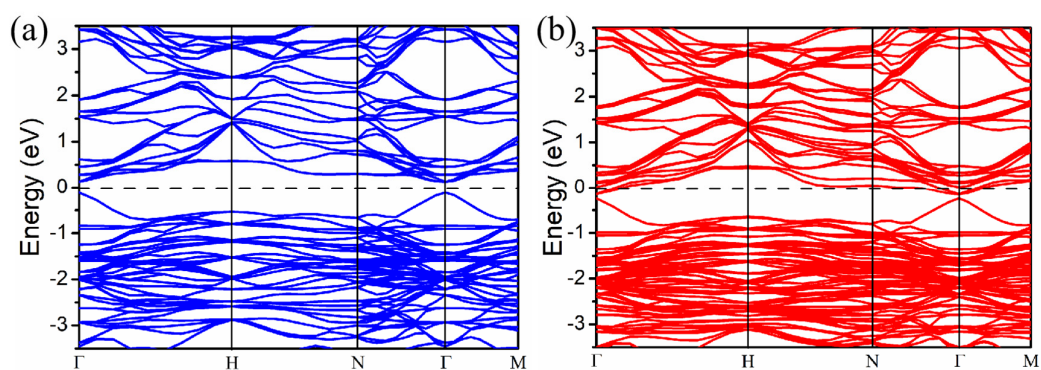

**Figure S9.** Electronic band structure of (a) CoP<sub>3</sub> and (b) Ni-CoP<sub>3</sub>.

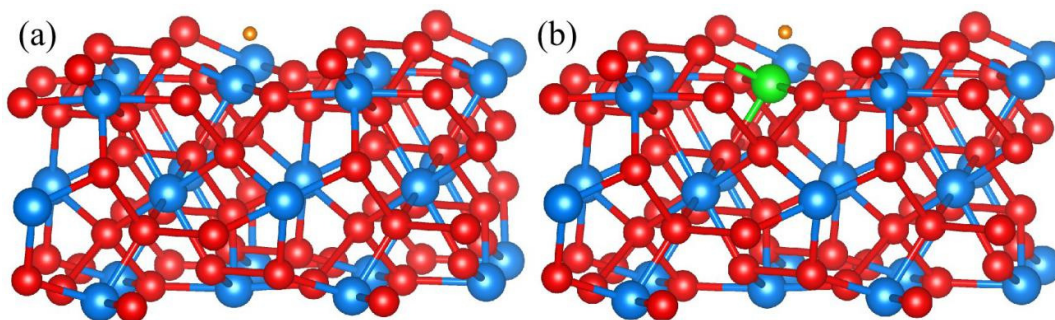

**Figure S10.** The configuration of hydrogen adsorption on CoP<sub>3</sub> (a) and Ni-CoP<sub>3</sub> (b).

**Table S1.** Comparison of HER performance in acid media for CoP<sub>3</sub> HSs/CC

with other TMPs HER electrocatalysts.

| Catalyst                    | Onset $\eta$ (mV) | Current density ( $j$ , mA cm <sup>-2</sup> ) | $\eta$ at the corresponding $j$ (mV) | Exchange current density (mA cm <sup>-2</sup> ) | Ref.                                           |
|-----------------------------|-------------------|-----------------------------------------------|--------------------------------------|-------------------------------------------------|------------------------------------------------|
| FeP nanosheets              | 100               | 10                                            | 240                                  | -                                               | <i>Chem. Commun.</i> , 2013, 49, 6656          |
| FeP NWs/Ti                  | 38                | 10                                            | 55                                   | 0.42                                            | <i>Angew. Chem. Int. Ed.</i> , 2014, 53, 12855 |
| FeP NWs                     | -                 | 10                                            | 96                                   | 0.17                                            | <i>Chem. Commun.</i> , 2016, 52, 2819.         |
| FeP NPs                     | 38                | 10                                            | 112                                  | -                                               | <i>Nanoscale</i> , 2015, 7, 4400               |
| FeP NAs                     | -                 | 10                                            | 85                                   | -                                               | <i>J. Mater. Chem. A</i> , 2014, 2, 17263      |
| FeP <sub>2</sub> /C         | -                 | 5                                             | 500                                  | 1.75*10 <sup>-3</sup>                           | <i>J. Mater. Chem. A</i> , 2015, 3, 499        |
| Ni <sub>2</sub> P NPs       | -                 | 20                                            | 130                                  | 2.7*10 <sup>-3</sup>                            | <i>J. Am. Chem. Soc.</i> , 2013, 135, 9267     |
| Ni <sub>2</sub> P/graphene  | 37                | 10                                            | 102                                  | 0.049                                           | <i>J. Power Sources</i> , 2015, 297, 45        |
| Ni <sub>2</sub> P/CNs       | 40                | 10                                            | 92                                   | -                                               | <i>J. Power Sources</i> , 2015, 285, 169       |
| NiP <sub>2</sub> /CC        | -                 | 10                                            | 116                                  | 0.26                                            | <i>Nanoscale</i> , 2014, 6, 13440              |
| Se doped NiP <sub>2</sub>   | -                 | 10                                            | 84                                   | -                                               | <i>ACS Catal.</i> , 2015, 5, 6355              |
| Cu <sub>3</sub> P NWs       | 62                | 10                                            | 143                                  | 0.18                                            | <i>Angew. Chem. Int. Ed.</i> , 2014, 53, 9577  |
| MoP Bulk                    | 50                | 30                                            | 180                                  | 0.034                                           | <i>Energy Environ. Sci.</i> , 2014, 7, 2624    |
| MoP NPs                     | 40                | 10                                            | 125                                  | 0.086                                           | <i>Adv. Mater.</i> , 2014, 26, 5702            |
| MoP <sub>2</sub> NPs/Mo     | -                 | 10                                            | 143                                  | 0.06                                            | <i>Nanoscale</i> , 2016, 8, 8500               |
| MoP <sub>2</sub> nanosheets | -                 | 10                                            | 58                                   | -                                               | <i>J. Mater. Chem. A</i> , 2016, 4, 7169       |
| WP                          | 50                | 10                                            | 120                                  | -                                               | <i>Chem. Commun.</i> , 2014, 50, 11026         |
| $\alpha$ -WP <sub>2</sub>   | 54                | 10                                            | 161                                  | 0.017                                           | <i>ACS Catal.</i> , 2015, 5, 145               |
| $\beta$ -WP <sub>2</sub>    | 56                | 10                                            | 148                                  | 0.013                                           | <i>J. Power Sources</i> , 2015, 278, 540       |
| Co <sub>2</sub> P           | -                 | 10                                            | 95                                   | -                                               | <i>Chem. Mater.</i> , 2015, 27, 3769           |
| CoP/CC                      | 38                | 10                                            | 67                                   | 0.288                                           | <i>J. Am. Chem. Soc.</i> , 2014, 136, 7587     |
| CoP NPs                     | -                 | 20                                            | 85                                   | -                                               | <i>Angew. Chem. Int. Ed.</i> , 2014, 53, 5427  |
| CoP/CNs                     | 40                | 10                                            | 122                                  | 0.13                                            | <i>Angew. Chem. Int. Ed.</i> , 2014, 53, 6710  |
| Ni-CoP <sub>3</sub> NWAs    | 33                | 10                                            | 95                                   | 0.217                                           | This work                                      |
|                             |                   | 100                                           | 177                                  |                                                 |                                                |

NPs (Nanoparticles); CNs (Carbon Nanotubes); CC (Carbon Cloth); NWs (Nanowires); NAs (Nanoneedle Arrays); CPs (Concave Polyhedrons)

**Table S2.** Comparison of HER performance in neutral media for Ni-CoP<sub>3-7</sub> NWAs/CC with other HER electrocatalysts.

| Catalyst                   | Current density ( <i>j</i> , mA cm <sup>-2</sup> ) | Potential at the corresponding <i>j</i> (mV) | Ref.                                                 |
|----------------------------|----------------------------------------------------|----------------------------------------------|------------------------------------------------------|
| Mo <sub>2</sub> B          | 1                                                  | 250                                          | <i>Angew. Chem. Int. Ed.</i> , 2012, 51, 12703       |
| Mo <sub>2</sub> C          | 1                                                  | 200                                          | <i>Angew. Chem. Int. Ed.</i> , 2012, 51, 12703       |
| Co-S/FTO                   | 2                                                  | 83                                           | <i>J. Am. Chem. Soc.</i> , 2013, 135, 17699          |
| CuMoS <sub>4</sub>         | 2                                                  | 210                                          | <i>Energy Environ. Sci.</i> , 2012, 5, 8912          |
| WP                         | 10                                                 | 200                                          | <i>ACS Appl. Mater. Interfaces</i> , 2014, 6, 218740 |
| WP <sub>2</sub>            | 10                                                 | 298                                          | <i>J. Power Sources</i> , 2015, 278, 540             |
| MoP <sub>2</sub> NPs/Mo    | 10                                                 | 211                                          | <i>Nanoscale</i> , 2016, 8, 8500                     |
| CoP NPs                    | 2                                                  | 65                                           | <i>J. Am. Chem. Soc.</i> , 2014, 136, 7587           |
| CoP <sub>3</sub> NPAs      | 10                                                 | 138                                          | <i>Appl. Surf. Sci.</i> , 2019, 494, 179-186         |
| Ni-CoP <sub>3-7</sub> NWAs | 10                                                 | 129                                          | This work                                            |

**Table S3.** Comparison of HER performance in alkaline media for CoP<sub>3</sub> NPAs/CC with other HER electrocatalysts.

| Catalyst                    | Current density ( <i>j</i> , mA cm <sup>-2</sup> ) | Potential at the corresponding <i>j</i> (mV) | Ref.                                                 |
|-----------------------------|----------------------------------------------------|----------------------------------------------|------------------------------------------------------|
| Ni wire                     | 10                                                 | 350                                          | <i>ACS Catal.</i> , 2013, 3, 166                     |
| MoB                         | 10                                                 | 225                                          | <i>Angew. Chem. Int. Ed.</i> , 2012, 51, 12703       |
| NiP <sub>2</sub>            | 10                                                 | 102                                          | <i>Nanoscale</i> , 2014, 6, 13440                    |
| WP                          | 10                                                 | 250                                          | <i>ACS Appl. Mater. Interfaces</i> , 2014, 6, 218740 |
| WP <sub>2</sub>             | 10                                                 | 225                                          | <i>J. Power Sources</i> , 2014, 136, 7587            |
| MoP <sub>2</sub> nanosheets | 10                                                 | 85                                           | <i>J. Mater. Chem. A</i> , 2016, 4, 7169             |
| MoP <sub>2</sub> NPs/Mo     | 10                                                 | 194                                          | <i>Nanoscale</i> , 2016, 8, 8500                     |
| CoP nanowires               | 10                                                 | 209                                          | <i>J. Am. Chem. Soc.</i> , 2014, 136, 7587           |
| CoP <sub>3</sub> NPAs       | 10                                                 | 109                                          | <i>Appl. Surf. Sci.</i> , 2019, 494, 179-186         |
| Ni-CoP <sub>3</sub> -7 NWAs | 10                                                 | 102                                          | This work                                            |
